# Supplementary material for: Formation of the Long Range Dpp Morphogen Gradient
Source: PubMed Central journal article supplement (PMC3144185; doi:10.1371/journal.pbio.1001111), 2011-07-26

# *tkv<sup>-</sup>brk<sup>-</sup>* LOF clones

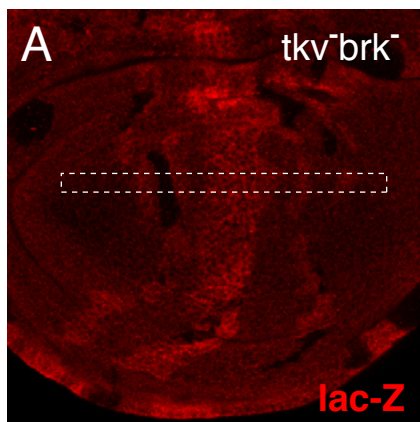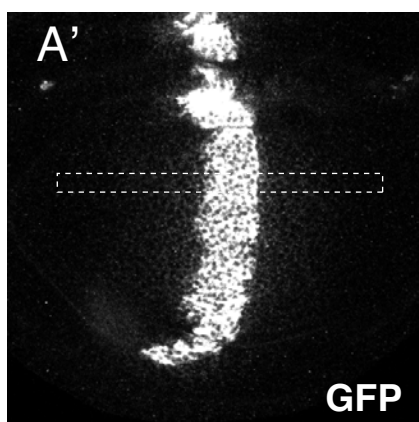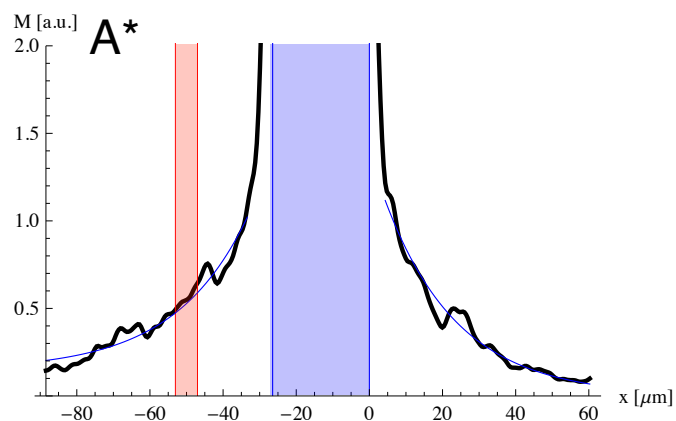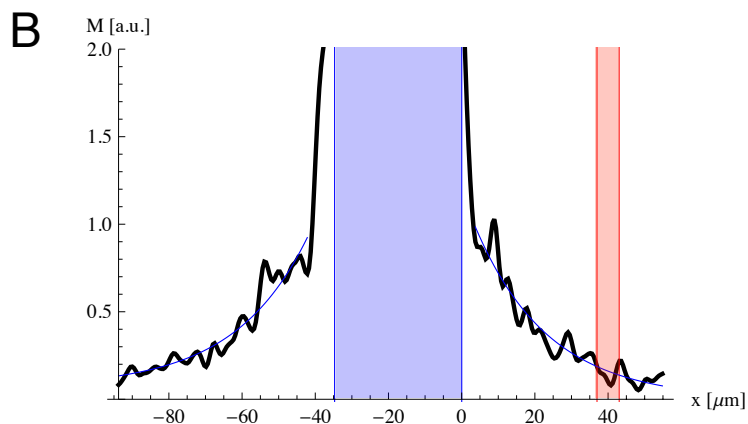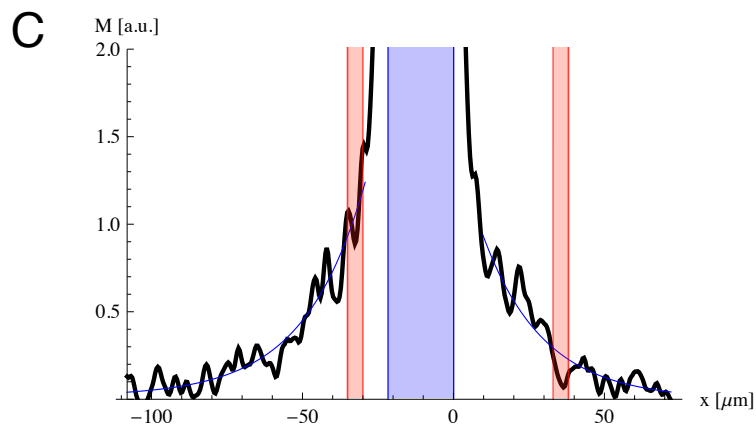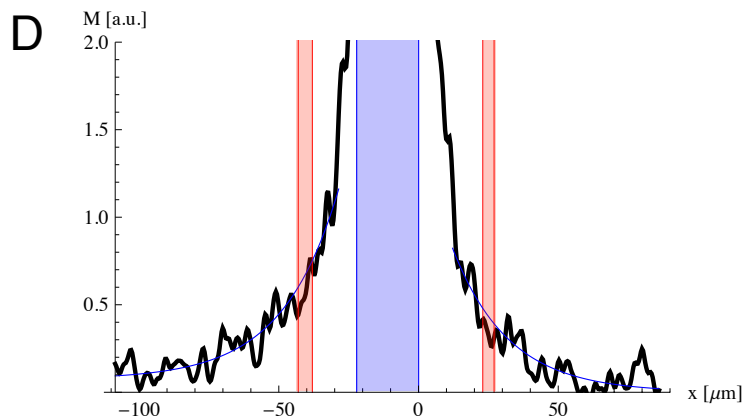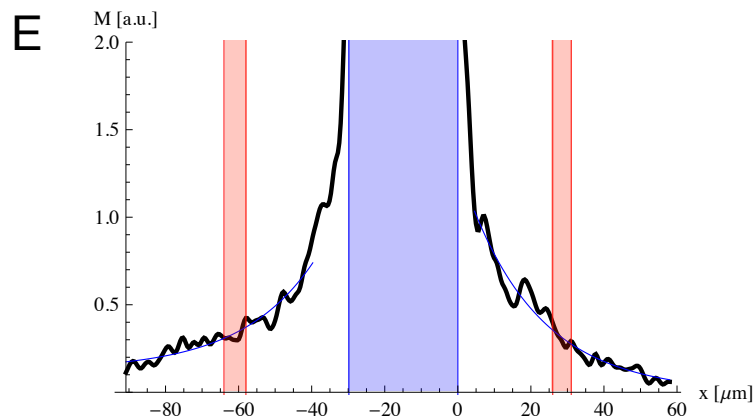

Supplement: pbio.1001111.s008.pdf [file pbio.1001111.s008.pdf]
