# Supplementary material for: Formation of the Long Range Dpp Morphogen Gradient
Source: PubMed Central journal article supplement (PMC3144185; doi:10.1371/journal.pbio.1001111), 2011-07-26

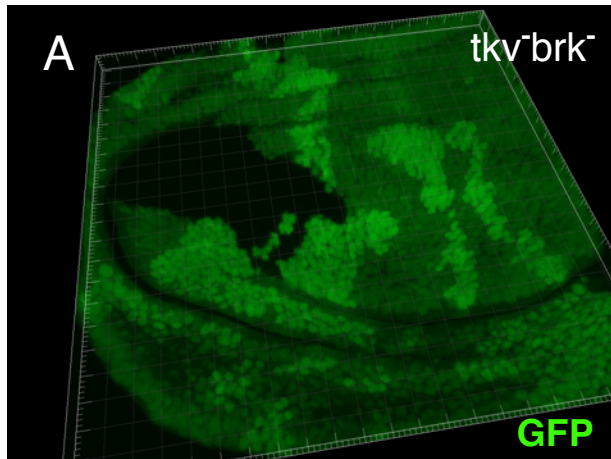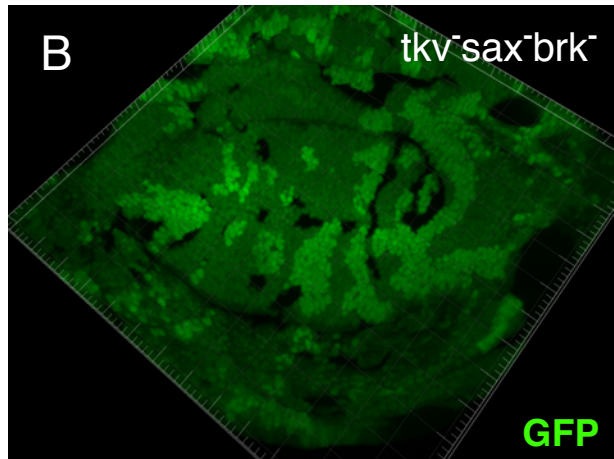

Supplement: pbio.1001111.s009.pdf [file pbio.1001111.s009.pdf]
